# Supplementary material for: Itch Is Required for Lateral Line Development in Zebrafish
Source: PubMed Central journal article supplement (PMC4219781; doi:10.1371/journal.pone.0111799), 2014-11-04
Supplement: pone.0111799.s002.pdf [file pone.0111799.s002.pdf]

**Table S.1. Accession number of sequences used for alignment**

| <b>Gene</b>                | <b>Accession Number</b> |
|----------------------------|-------------------------|
| Human                      |                         |
| <i>ITCH</i>                | NM_001257137            |
| <i>WWP1</i>                | NM_007013               |
| <i>WWP2</i>                | NM_007014               |
| <i>NEDL2</i>               | NM_020760               |
| <i>NEDL1</i>               | NM_015052               |
| <i>NEDD4L</i>              | NM_001144967            |
| <i>NEDD4</i>               | NM_006154               |
| <i>SMURF2</i>              | NM_022739               |
| <i>SMURF1</i>              | NM_020429               |
| Zebrafish                  |                         |
| <i>itcha</i>               | XM_002667532            |
| <i>itchb</i>               | XM_003201654            |
| <i>wwp1</i>                | XM_003201365            |
| <i>wwp2</i>                | NM_001099448            |
| <i>nedl1</i>               | NM_001145764            |
| <i>nedl2a</i>              | XM_001922405            |
| <i>nedl2b</i>              | XM_003197612            |
| <i>nedd4l</i>              | XM_682997               |
| <i>nedd4</i>               | NM_001034186            |
| <i>smurf1</i>              | NM_001001943            |
| <i>smurf2</i>              | NM_001114426            |
| Outgroup                   |                         |
| <i>Monosiga brevicolis</i> | XM_001743996            |
