# Supplementary material for: Itch Is Required for Lateral Line Development in Zebrafish
Source: PubMed Central journal article supplement (PMC4219781; doi:10.1371/journal.pone.0111799), 2014-11-04
Supplement: pone.0111799.s003.pdf [file pone.0111799.s003.pdf]

**Table S.2. Sequence of morpholino oligonucleotides**

| <b>Name</b>       | <b>Target</b> | <b>Sequence</b>                      | <b>Type</b> | <b>Binds to</b> |
|-------------------|---------------|--------------------------------------|-------------|-----------------|
| A1a               | <i>itcha</i>  | tcagctcataatgatccacCCTT <sup>a</sup> | Splice      | Exon 12 3' end  |
| A3b               | <i>itcha</i>  | ataatataagaactcacAGCGAGGA            | Splice      | Exon 13 3' end  |
| B4b               | <i>itcb</i>   | atgtgtttgcactcacAGGGAGGAT            | Splice      | Exon 13 3' end  |
| tp53 <sup>b</sup> | p53           | GCGCCATTGCTTTGCAAGAATTG              | Translation | Start codon     |

<sup>a</sup>Lowercase letters are complementary to intron sequence.

<sup>b</sup>Langheinrich *et al.* [27].
