# Supplementary material for: Itch Is Required for Lateral Line Development in Zebrafish
Source: PubMed Central journal article supplement (PMC4219781; doi:10.1371/journal.pone.0111799), 2014-11-04
Supplement: pone.0111799.s004.pdf [file pone.0111799.s004.pdf]

**Table S.3. Sequence of the PCR primers used in this study**

| <b>Name</b>      | <b>Sequence</b>                | <b>Position</b> |
|------------------|--------------------------------|-----------------|
| <i>itcha</i> -2F | 5'-CAGGAAAATCCTCGCTTGAG-3'     | 1550–1569       |
| <i>itcha</i> -2R | 5'-GTGGATGGCAACCCATAATC-3'     | 1710–1729       |
| <i>itcha</i> -8F | 5'-GCGCCGACAGCTAATAAAGA-3'     | 1297–1316       |
| <i>itcha</i> -8R | 5'-CTCAAGCGAGGATTTTCCTG-3'     | 1550–1569       |
| <i>itcb</i> -1F  | 5'-GAACCCGATGTACTGCCTGT-3'     | 1859–1878       |
| <i>itcb</i> -1R  | 5'-TGTTTCAGGATGCGCTTGTA-3'     | 2033–2052       |
| <i>itcb</i> -4F  | 5'-GCTTCAGCCACCCAGAATAA-3'     | 1320–1339       |
| <i>itcb</i> -3R  | 5'-AAAGAGAGTTTTGCGGCTGA-3'     | 1699–1718       |
| <i>cxcr4</i> -F  | 5'-GCCACAAACAGCCAAAACCTT-3'    | 461–480         |
| <i>cxcr4</i> -R  | 5'-CAGCATAGTCAAAGCGTCCA-3'     | 837–856         |
| <i>cxcr7</i> -F  | 5'-AGAGCCGAGAGGACACGTTA-3'     | 344–363         |
| <i>cxcr7</i> -R  | 5'-GGCGTCTGAATGGTCAGATT-3'     | 693–712         |
| <i>actin</i> -F  | 5'-AAGGCCAACAGGGAAAAGAT-3'     | 434–453         |
| <i>actin</i> -R  | 5'-GGTACGACCGGAGGCATAC-3'      | 523–541         |
| <i>gapdh</i> -F  | 5'-CTTGGCTCCTCTGGCTAAAGTT-3'   | 522–543         |
| <i>gapdh</i> -R  | 5'-GTCATACCAGGAGATGAGCTTGAC-3' | 976–999         |
