# Supplementary material for: Itch Is Required for Lateral Line Development in Zebrafish
Source: PubMed Central journal article supplement (PMC4219781; doi:10.1371/journal.pone.0111799), 2014-11-04
Supplement: pone.0111799.s005.pdf [file pone.0111799.s005.pdf]

**Table S.4. cDNA regions used as probes in in situ hybridization experiments**

| <b>Target</b>            | <b>Reference</b> | <b>Fragment</b> | <b>Vector</b> |
|--------------------------|------------------|-----------------|---------------|
| <i>itcha</i>             | XM_002667532     | 1297–1729       | pCRII         |
| <i>itcb</i>              | XM_003201654     | 1320–2052       | pCRII         |
| <i>cxc<sub>r</sub>4b</i> | NM_131834        | 461–856         | pCR4Blunt     |
| <i>cxc<sub>r</sub>7b</i> | NM_001083832     | 344–712         | pCRII         |
| <i>lef1</i>              | NM_131426        | 148–939         | pCRII         |
